# Supplementary material
Source: Springer Nature journal article supplement (https://www.springermedizin.de/resource/supplementary/12974_2013_959_MOESM8_ESM.pdf/9600534)

**A. Bone Marrow cells**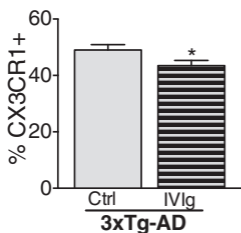**B. Monocytes**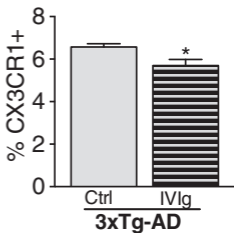**C. Correlations**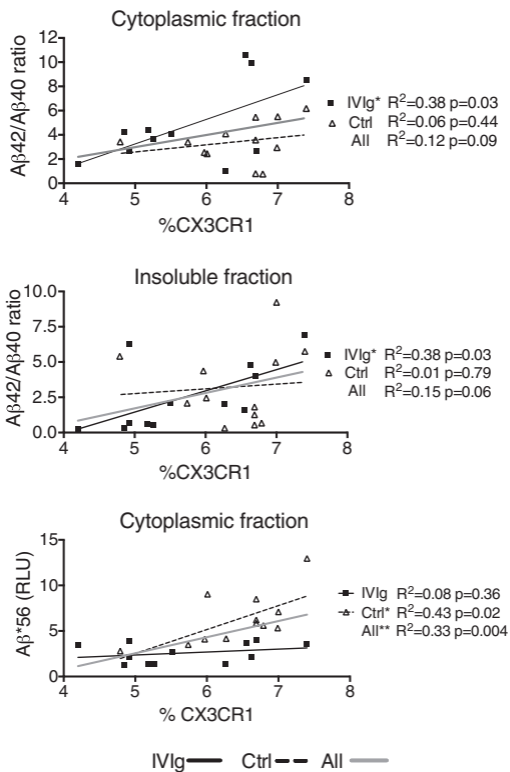

Supplement: MOESM8 [file 9600534]
